# Supplementary material
Source: Springer Nature journal article supplement (https://www.springermedizin.de/resource/supplementary/12903_2014_440_MOESM3_ESM.pdf/9516698)

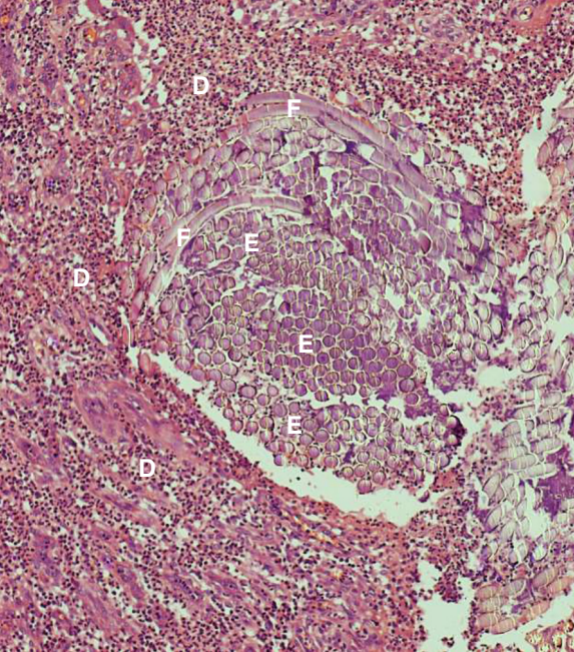

Supplement: MOESM3 [file 9516698]
